# Supplementary material
Source: publisher site journal article supplement (https://www.dovepress.com/article/259724)

# Nucleic acid delivery with $\alpha$ -tocopherol-Polyethyleneimine-Polyethylene glycol nanocarrier system

A K M Nawshad Hossian<sup>1</sup>, Seetharama Jois<sup>1</sup>, Subash C. Jonnalagadda<sup>2</sup> and George Mattheolabakis<sup>1\*</sup>

<sup>1</sup>School of Basic Pharmaceutical and Toxicological Sciences, College of Pharmacy, University of Louisiana Monroe, Monroe, LA; <sup>2</sup>Department of Chemistry and Biochemistry, Rowan University, Glassboro, NJ

## Supplementary information

**Supplementary Figure 1:** Representative size and zeta potential measurement of TPP<sub>111</sub> in HEPES buffer using DLS.

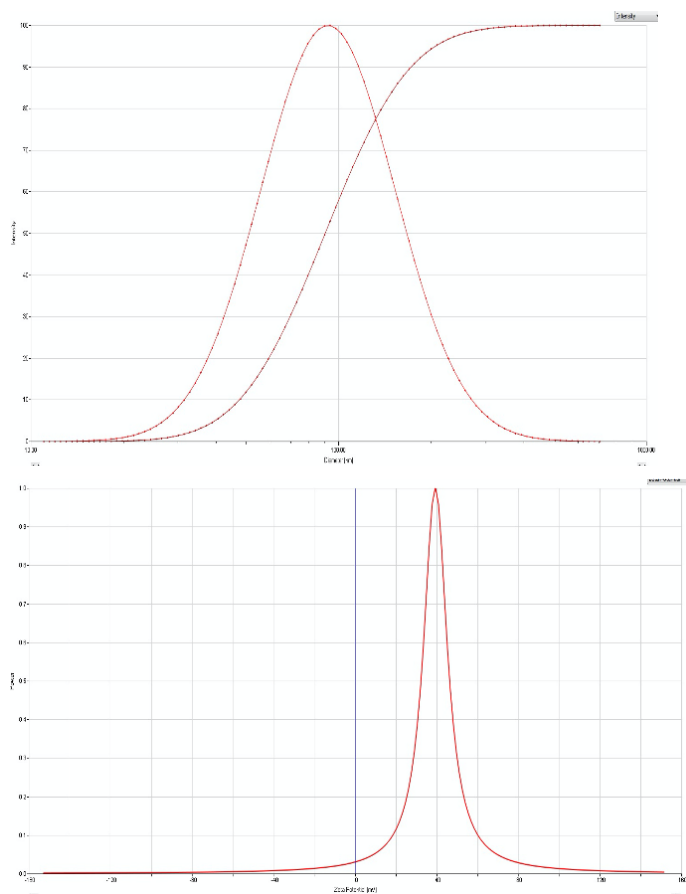

**Supplementary Figure 2:** Cell viability assay for PEI-1800 in A549 cells at 24, 48 and 72 h of incubation.

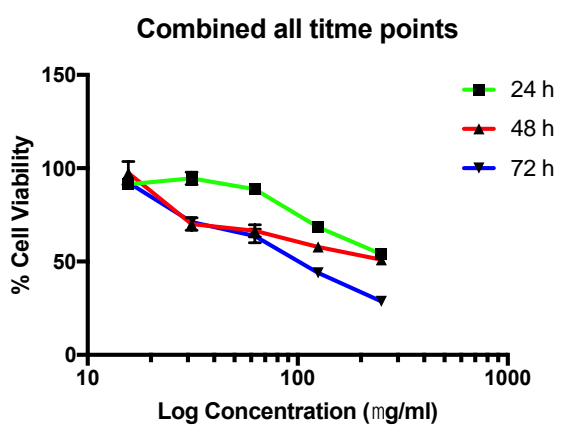

| Time points | IC <sub>50</sub> |
|-------------|------------------|
| 24 h        | 278.3 µg/ml      |
| 48 h        | 213.1 µg/ml      |
| 72 h        | 100.2 µg/ml      |

**Supplementary Figure 3:** The transfection of TPP<sub>111</sub> polymer complexed with pGL-3 luciferase-expressing plasmid was evaluated in H358 cells at 24, 48 and 72 h time points, using different N/P ratios; x-axis values indicate the P in the N/P ratio; #: p< 0.05; ##: p<0.01; ###:p<0.001. All statistical analyses are two-tailed t-tests compared to pGL-3 alone.

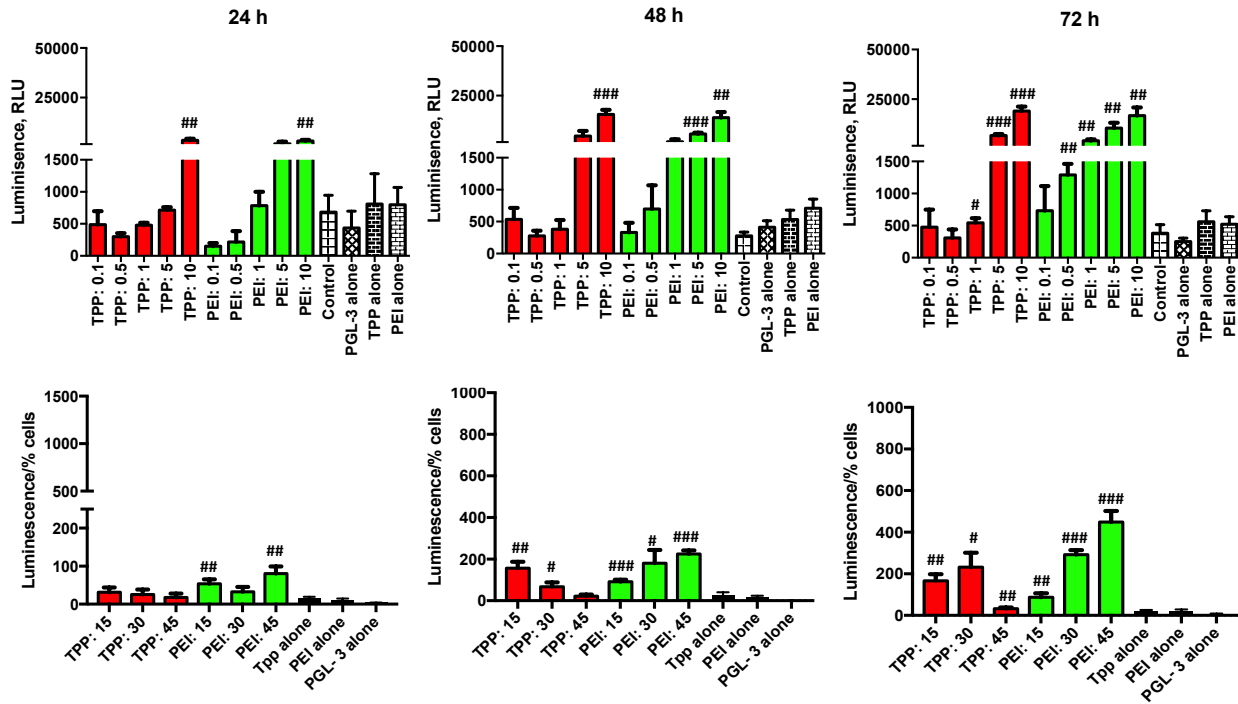

**Supplementary Figure 4:** Cellular uptake analysis of Cy-5.5-conjugated TPP<sub>111</sub> complexed with pGL-3 plasmid was detected in H358 cells using Confocal Laser Scanning Microscopy (CLSM), potentiated by endosomal uptake. Lysosomes and endosomes were stained with Red DND-99 (pseudo color green) and GFP (green), respectively. Nuclei (blue) were stained with DAPI. H358 cells were incubated with TPP<sub>111</sub>-plasmid complexes for different incubation periods. The scale bar is at 40  $\mu$ m. Co-localization of TPP<sub>111</sub>-plasmid complexes and endosomes/lysosomes is indicated with white arrows.

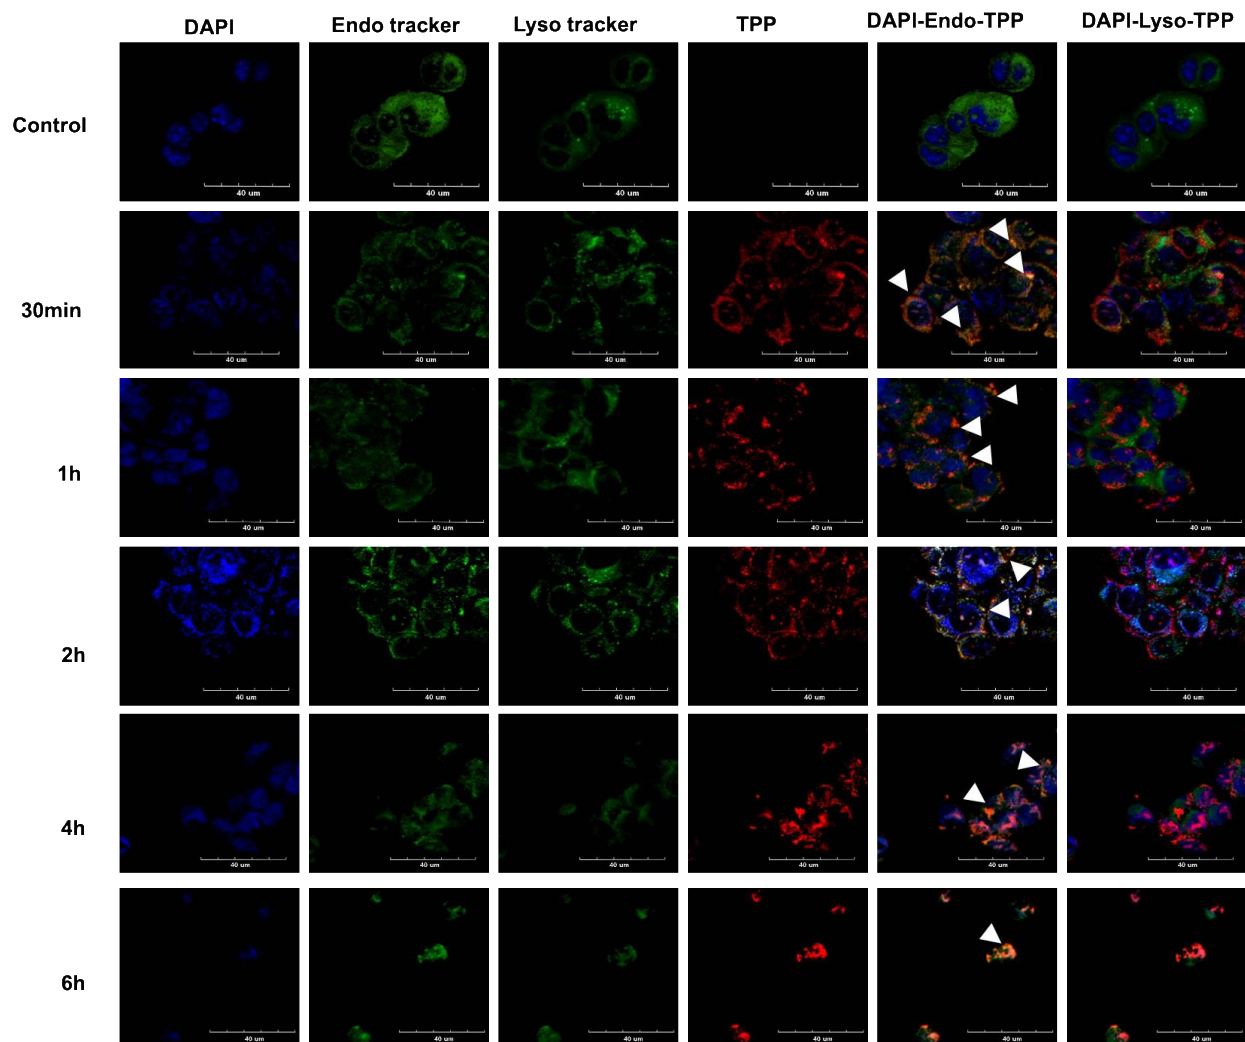

**Supplementary Figure 5:** *In vivo* organ biodistribution of Cy5.5 conjugated TPP<sub>111</sub> complexed with PGL3 plasmid, following i.v. administration, at different time points.

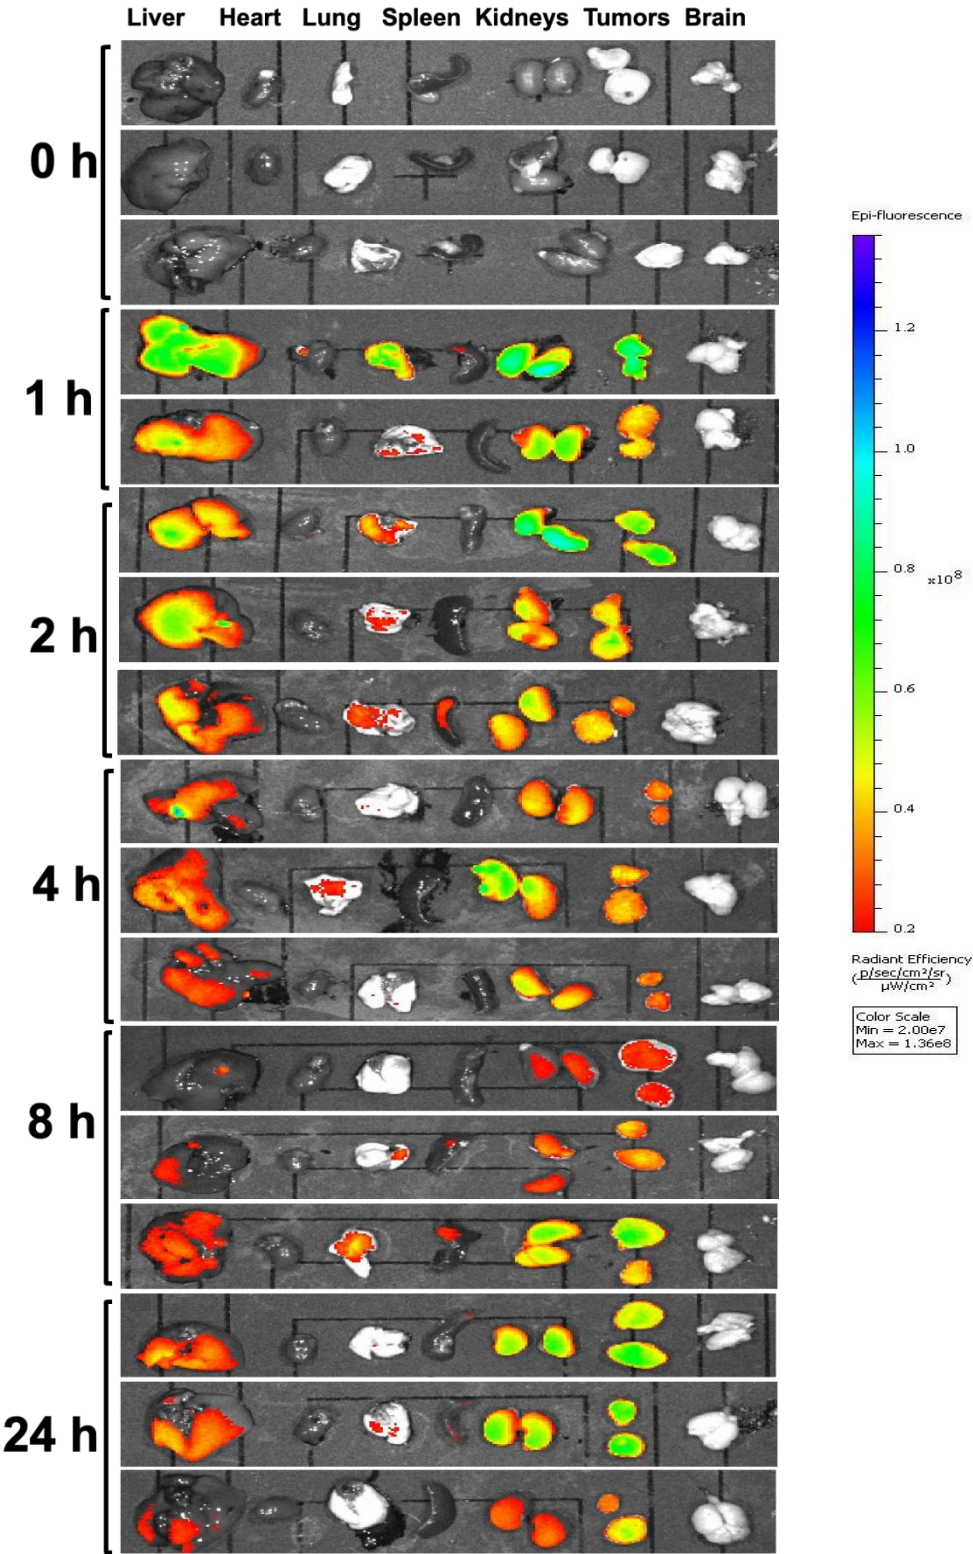

Supplement: Supplementary file 1 [file get_supplementary_file.php]
